# Supplementary material
Source: publisher figshare collection journal article supplement (https://acs.figshare.com/ndownloader/files/4137439)
Supplement: Supplementary file 1 [file 4137439]

## Supporting information

for manuscript entitled

### Interface of nanoparticle-coated electropolished stents

*Anne Neumeister<sup>1</sup>, Daniel Bartke<sup>2</sup>, Niko Bärsch<sup>2</sup>, Tobias Weingärtner<sup>3</sup>, Laure Guetaz<sup>4</sup>,  
Alexandre Montani<sup>4</sup>, Giuseppe Compagnini<sup>5</sup>, Stephan Barcikowski<sup>1,6\*</sup>*

1 Laser Zentrum Hannover e.V., Hollerithallee 8, 30419 Hannover, Germany

2 Particular GmbH, Hollerithallee 8, 30419 Hannover, Germany

3 Karlsruhe Institute of Technology (KIT), Institute for Applied Materials - Applied  
Materials Physics (IAM - AWP), Herrmann-von-Helmholtz-Platz 1, Building 688, 76344  
Eggenstein-Leopoldshafen, Germany

4 CEA, LITEN, DEHT-LCPEM, 17 rue des Martyrs, 38054 Grenoble Cedex 9, France

5 Dipartimento di Scienze Chimiche, Università di Catania, Viale A.Doria 6, Catania 95125,  
Italy

6 University of Duisburg-Essen, Technical Chemistry I and Center for Nanointegration  
Duisburg-Essen CENIDE, Universitaetsstr. 7, 45141 Essen, Germany

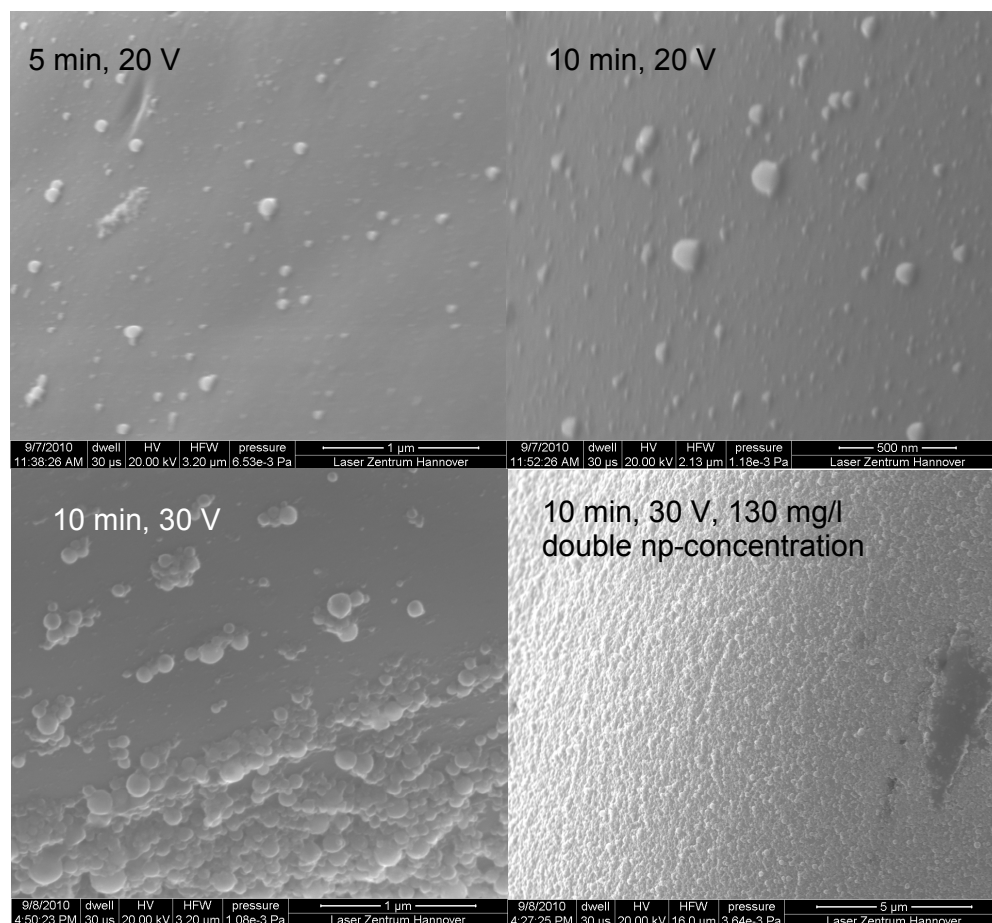

Figure S1. Stent surface coated by dielectrophoresis with laser-generated Ti nanoparticles at different electrophoresis conditions

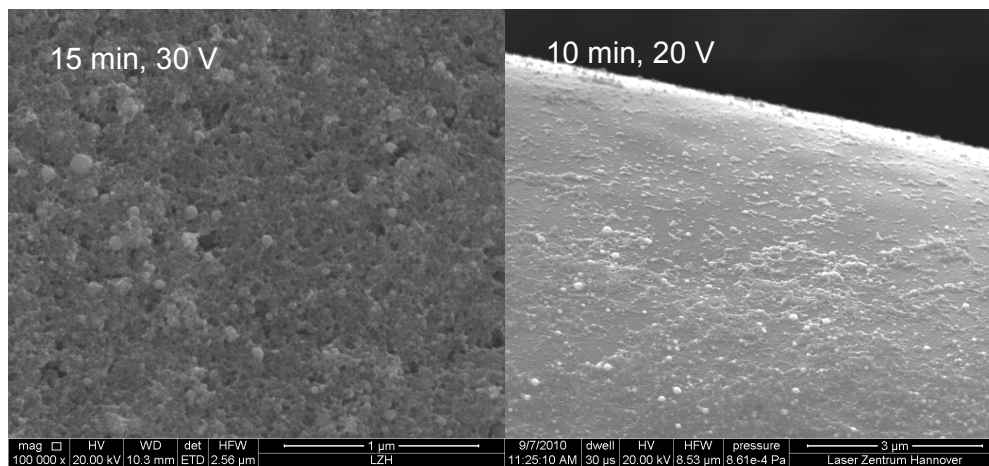

Figure S2. Stent surface coated by dielectrophoresis with laser-generated Au nanoparticles

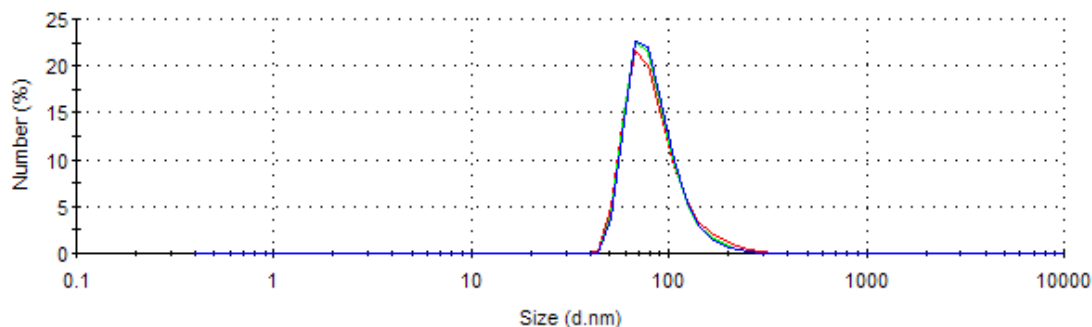

Figure S3. Size distribution of Ti nanoparticles generated by laser ablation in 2-propanol measured using dynamic light scattering

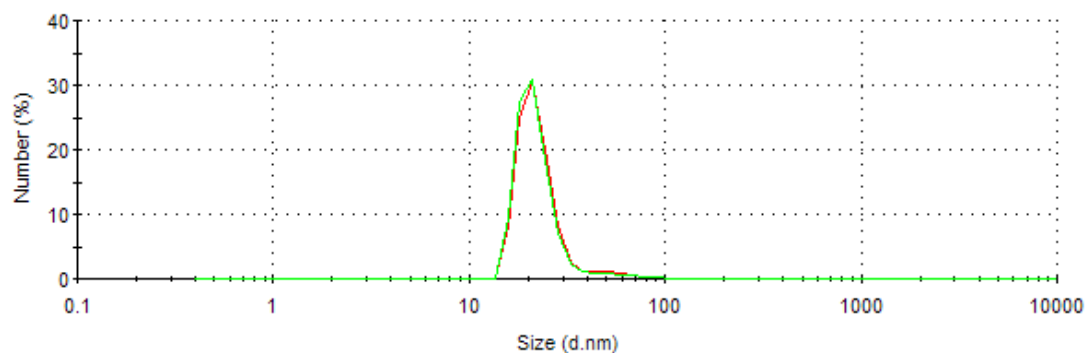

Figure S4. Size distribution of Au nanoparticles generated by laser ablation in 2-propanol measured using dynamic light scattering

#### Nanoparticle generation:

The laser beam was focused by an f-theta lens of 56 mm focal length through a quartz glass window into a self-constructed chamber onto the surface of the fixed target. The laser beam was guided using a scanner system (Scanlab HurrySCAN II-14) and the target was ablated by a fixed spiral scan pattern (diameter 5 mm, interline distance 50  $\mu\text{m}$ ). The liquid layer between the entrance window and ablation target was  $5.5 \pm 0.5$  mm. A motor-driven stirrer

generated constant volume flow (total volume 30 mL). The nanoparticle concentration was estimated gravimetrically while weighing the target before and after ablation.

#### XPS:

The X-ray radiation was generated by Al K $\alpha$  line decay (1486 eV) at operating conditions of 10 kV and 15 mA. The emitted photoelectrons were analyzed with a hemispherical electron energy analyzer.

#### Auger:

The analyses were performed with 10 keV acceleration voltage and 20 nA beam current for the electron beam. The AES depth profiles were obtained using a 2 keV Ar ion beam. The sputtering rate was 10 nm min<sup>-1</sup> for a SiO<sub>2</sub> standard. The real sputter rates are strongly dependent on each material. Therefore the reported depths in the profiles are adapted with experienced data.

#### XRD:

X-ray diffraction (XRD) was carried out by Dr. Oleg Prymak from the Department for X-Ray Diffraction of the Institute of Inorganic Chemistry, University of Duisburg-Essen. Details of the measurement are included in the manuscript.

Nanoparticle dispersion was dried before measurement on the surface of the Si monocrystal which serves as sample holder. A time step of 3 s was chosen, leading to a total measurement time of approximately 10 hours. The crystallite size of the phases, using the Scherrer-equation (including the determination of the instrumental broadening of the diffractometer), and their weight percentages were determined using the Rietveld refinement program package TOPAS 4.2 from Bruker. The final Rwp-factor 2.8 after the refinement procedure was achieved.

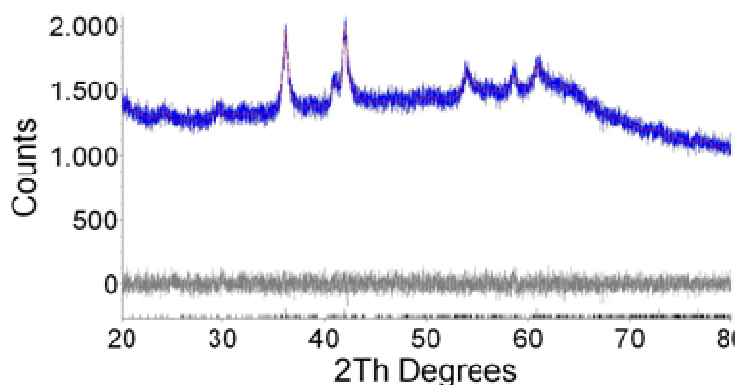

Figure S5. XRD data from laser-generated Ti-based nanoparticle colloid
